# Supplementary material
Source: MDPI journal article supplement (https://www.mdpi.com/2073-4441/14/9/1448)
Supplement: s1 [file s1]

Supplement material

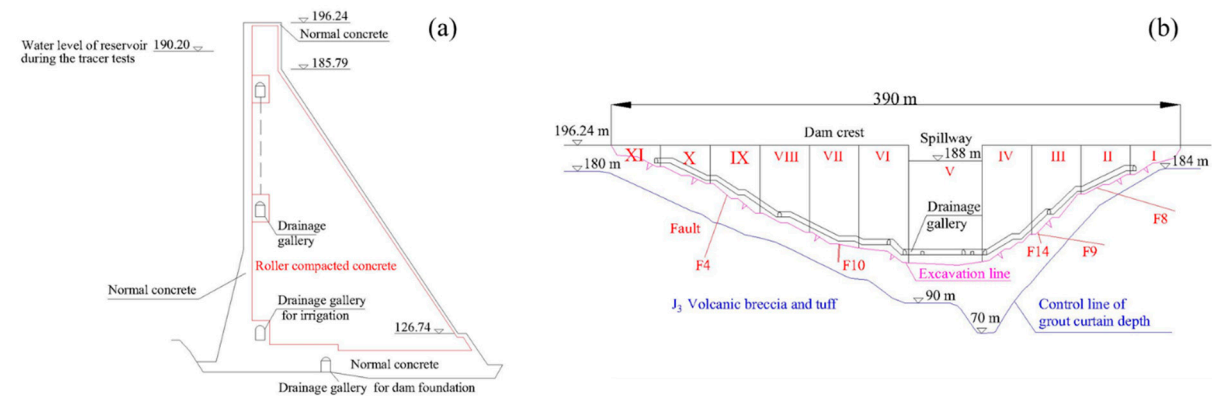

Figure S1 dam structure sketch: (a) profile of dam wall structure; (b) SW-NE cross section of dam structure.

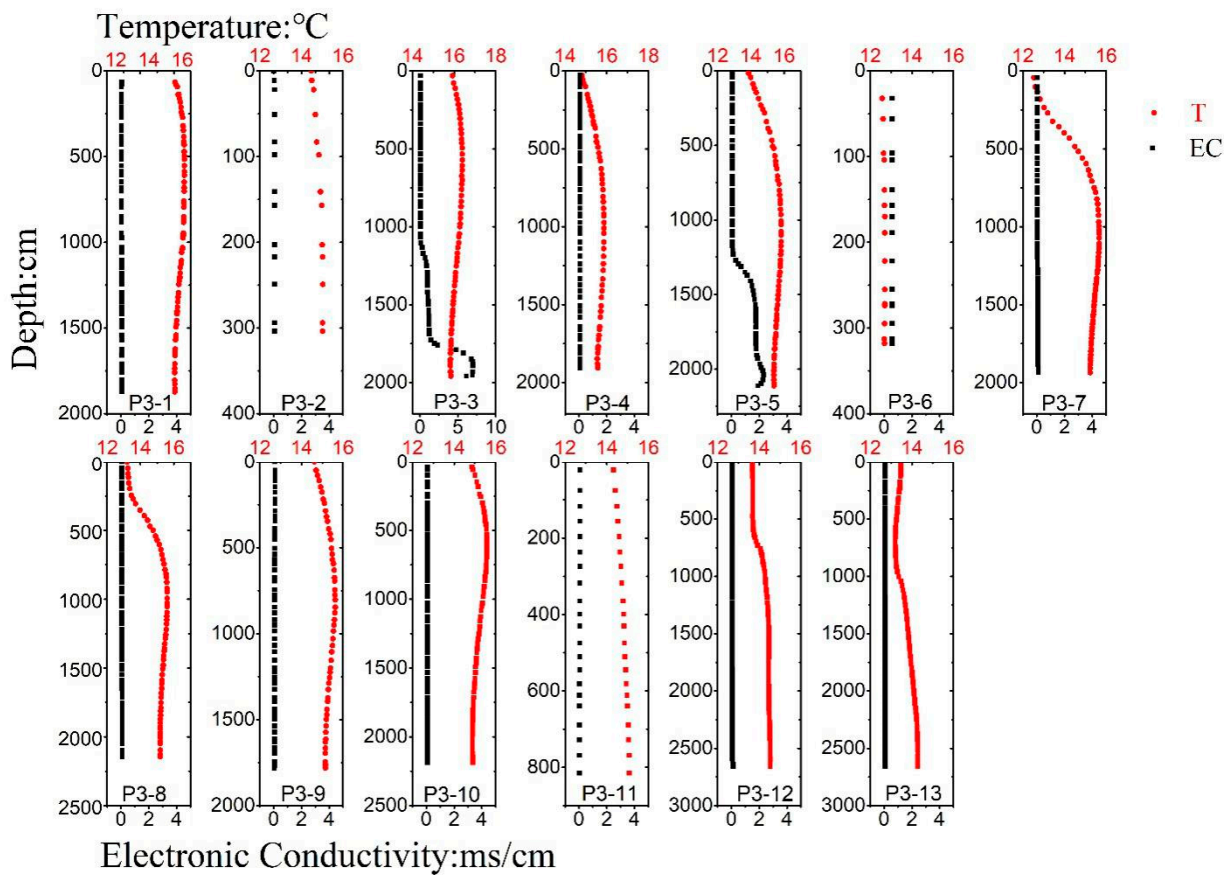

Figure S2 temperature profiles of dam section III

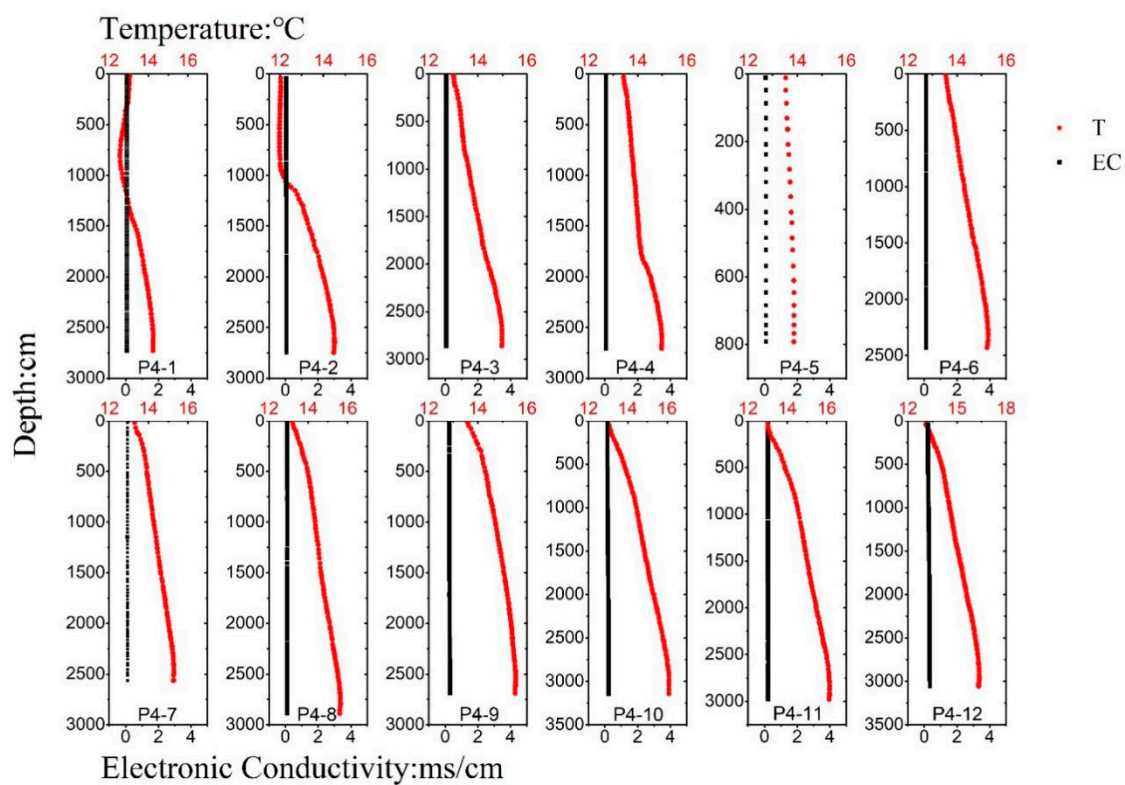

Figure S3 temperature profiles of dam section IV

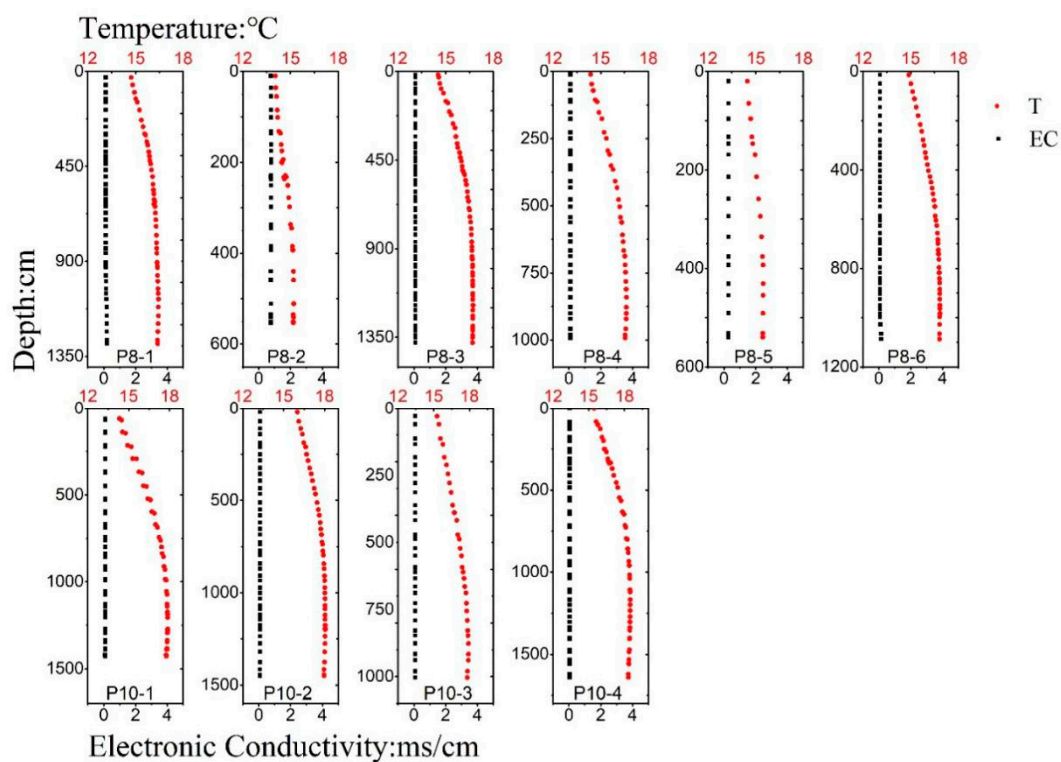

Figure S4 temperature profiles of dam section VIII and X

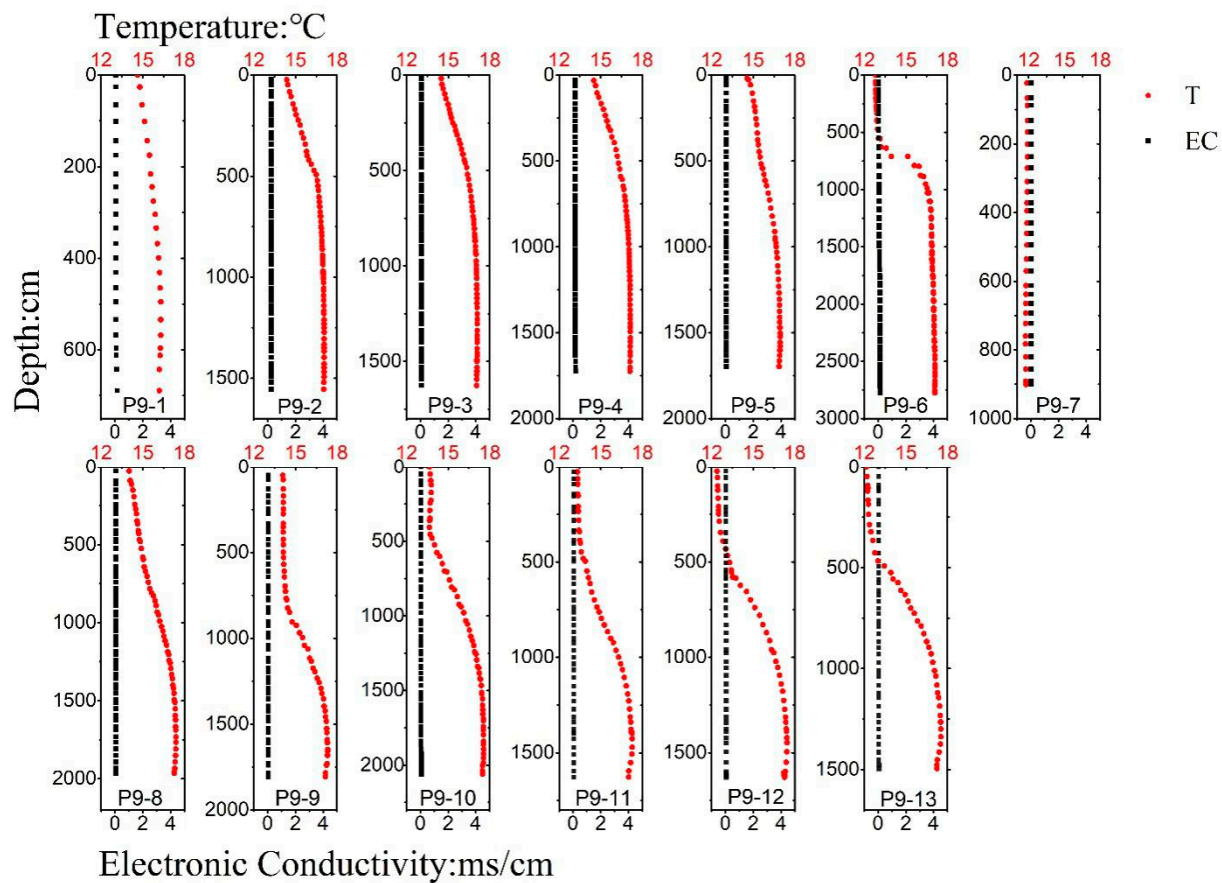

Figure S5 temperature profiles of dam section IX

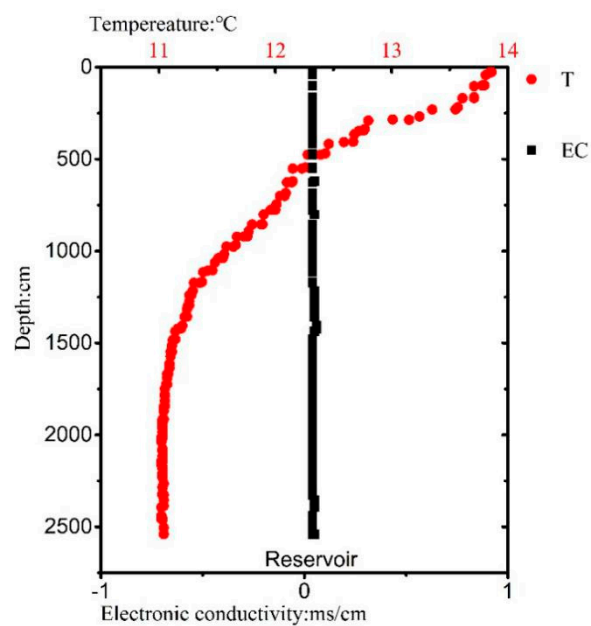

Figure S6 Temperature and electronic conductivity profile of reservoir which is in front of

dam.

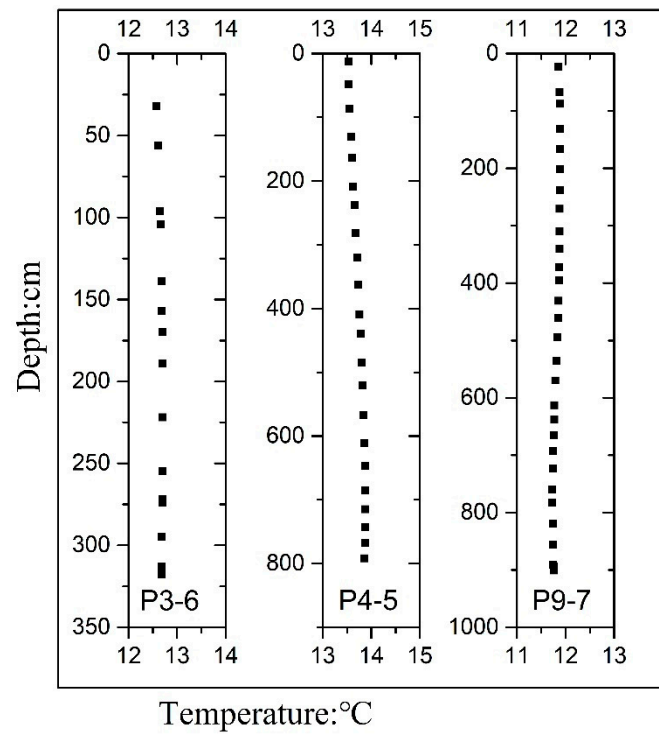

Figure S7 temperature profiles of Class 1

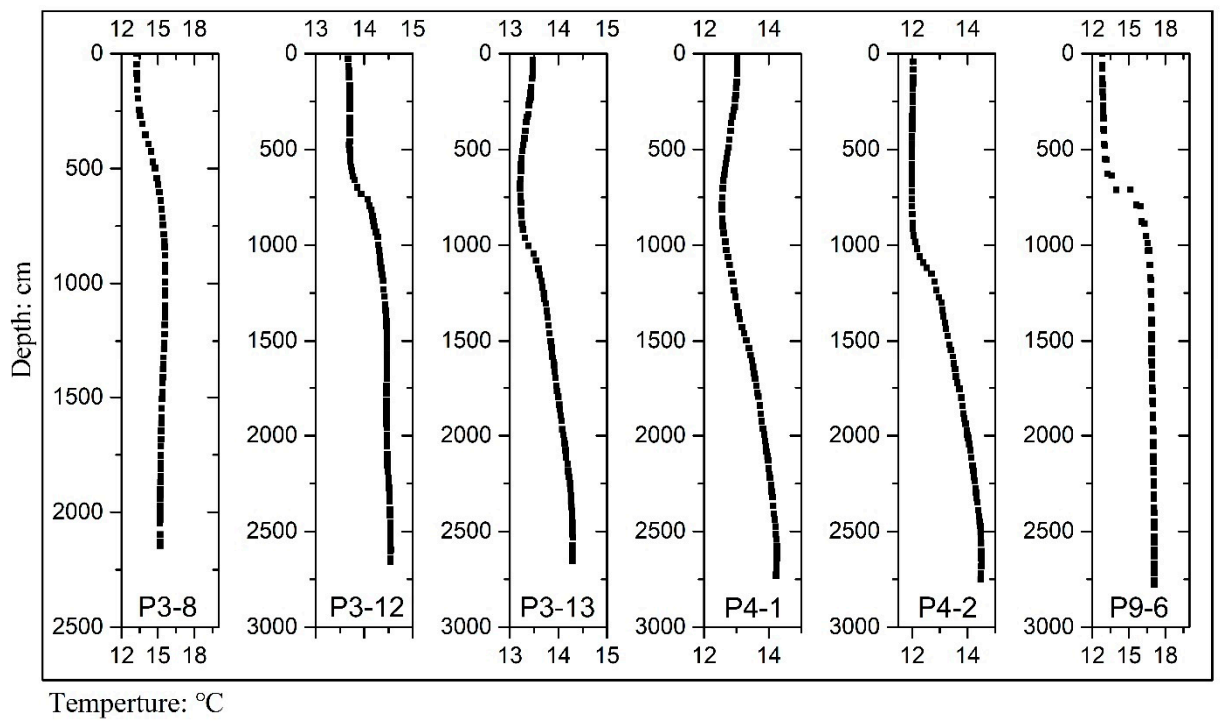

(a)

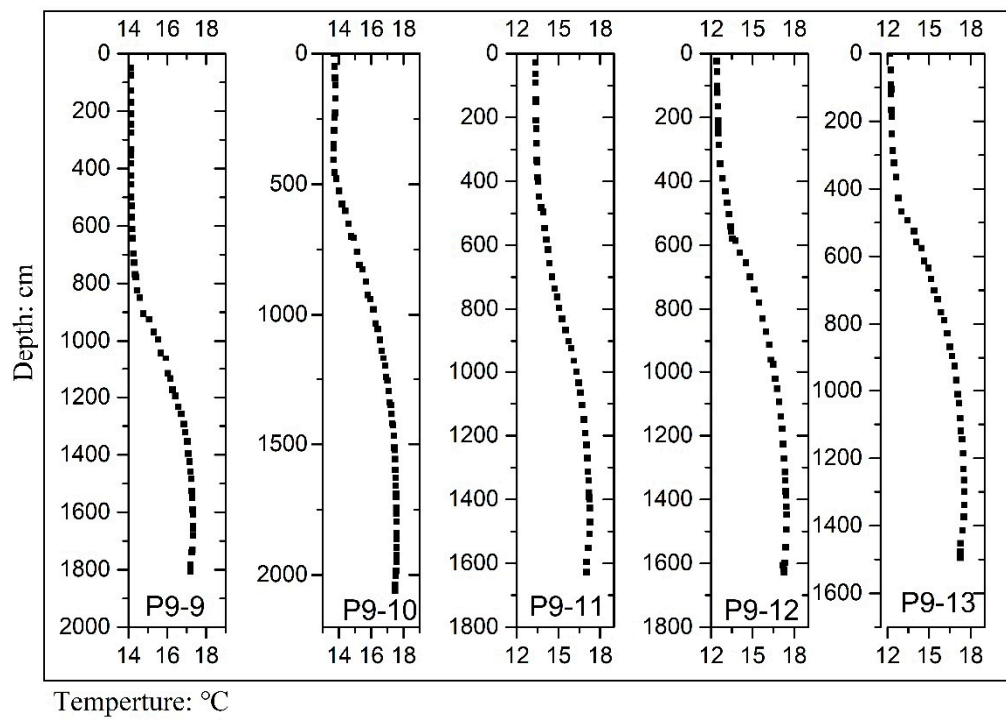

(b)

Figure S8 temperature profiles of Class 2

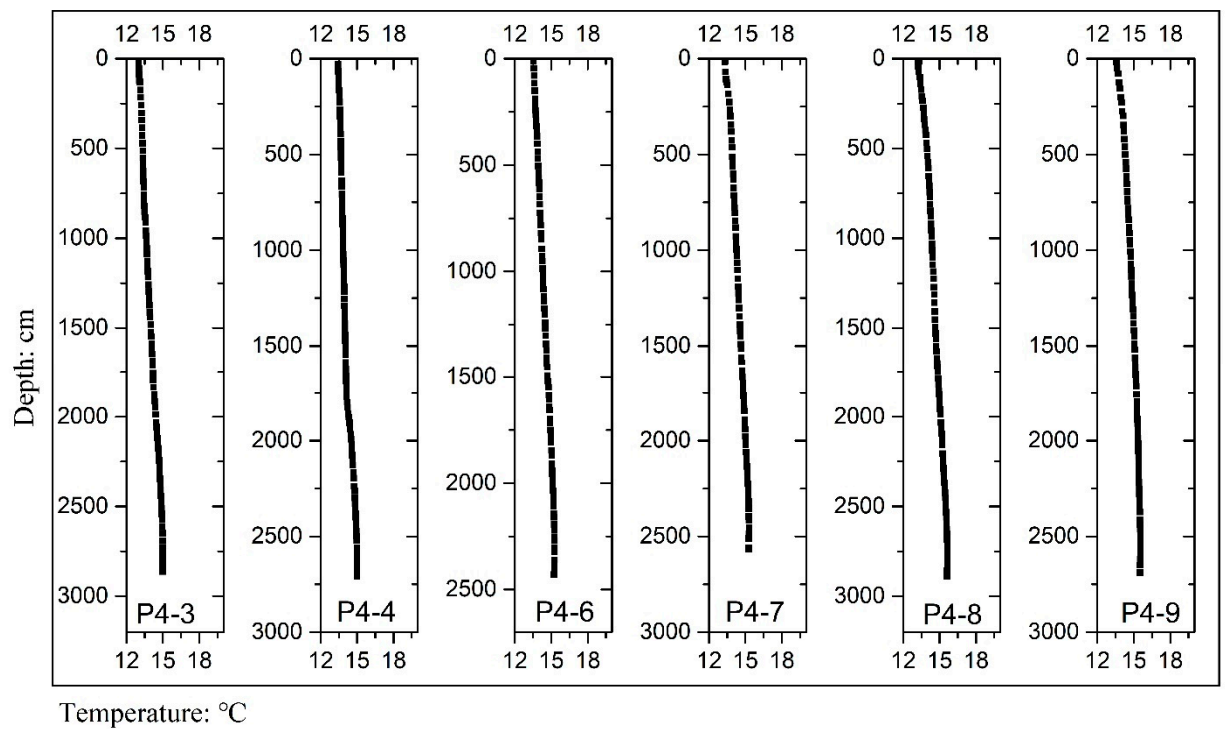

(a)



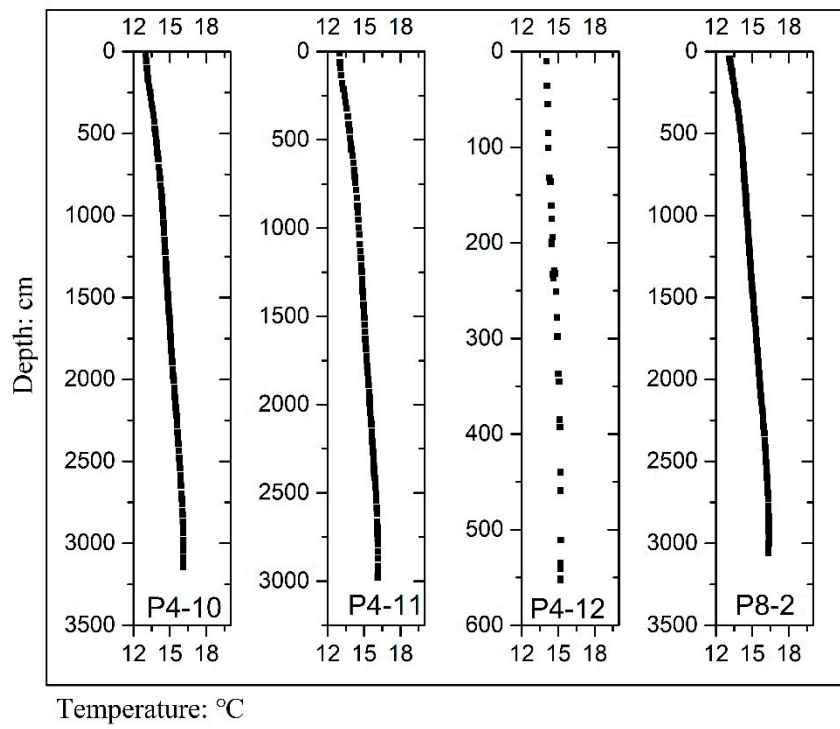

(b)

Figure S9 temperature profiles of Class 3

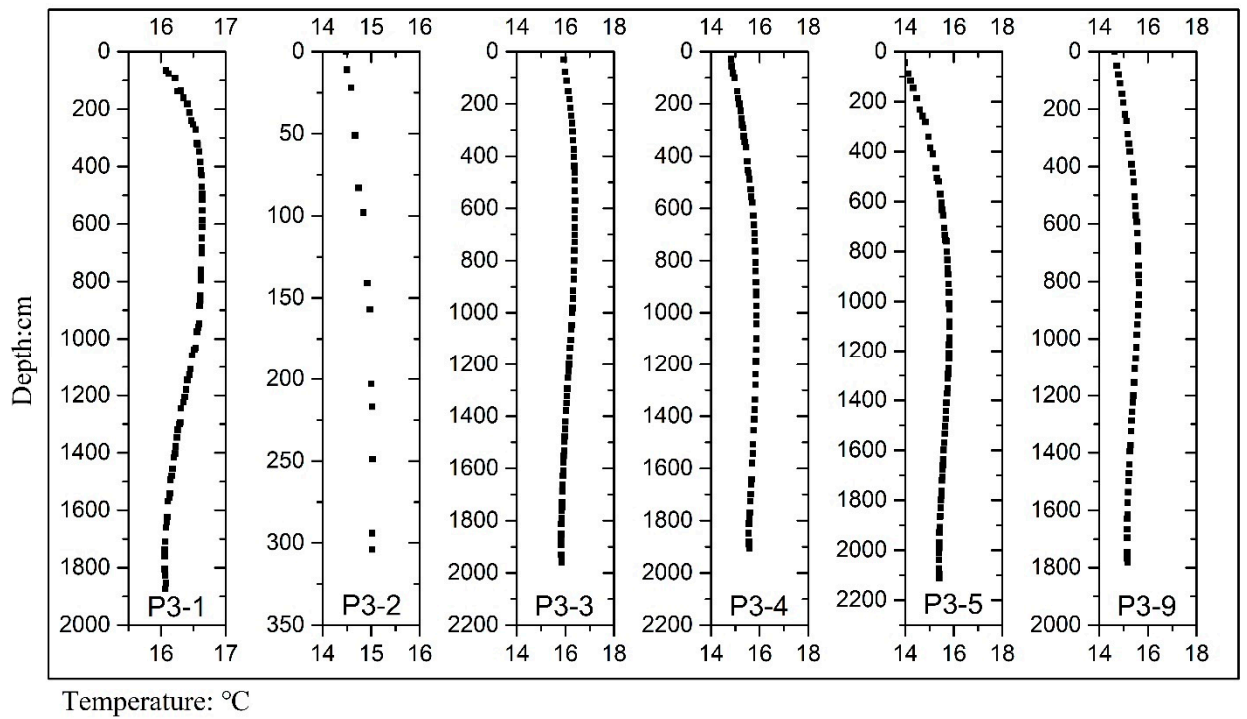

(a)

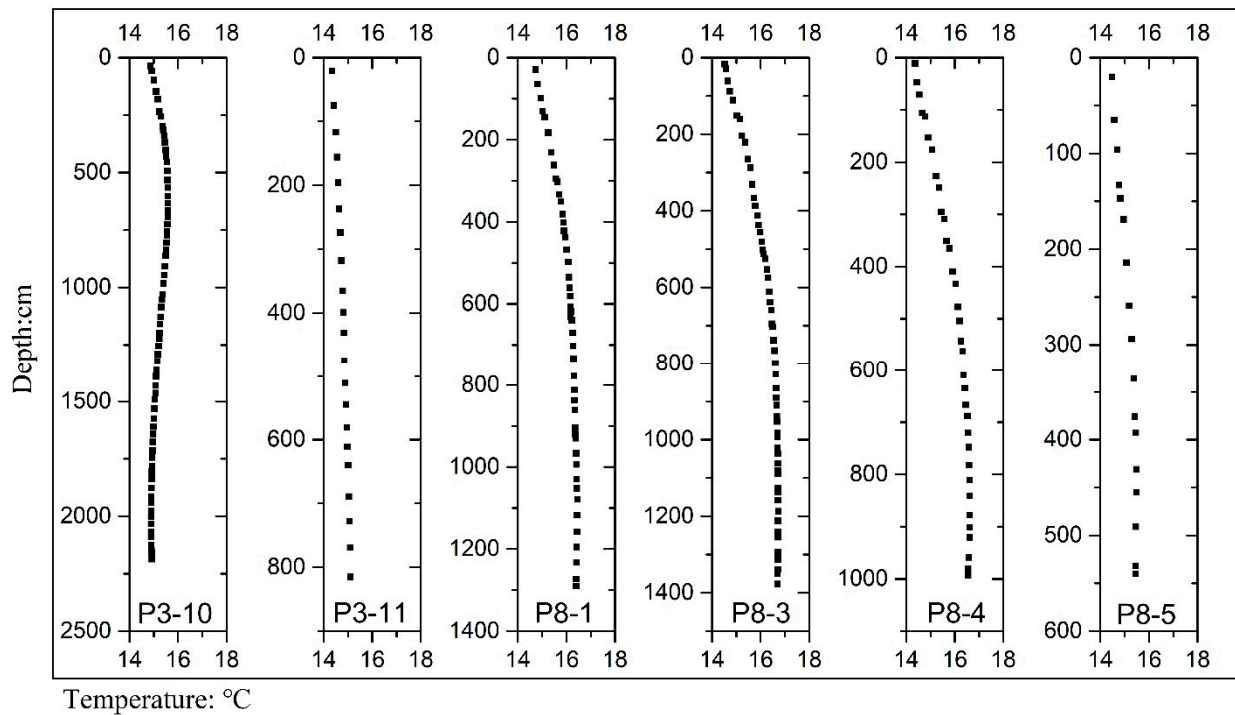

(b)

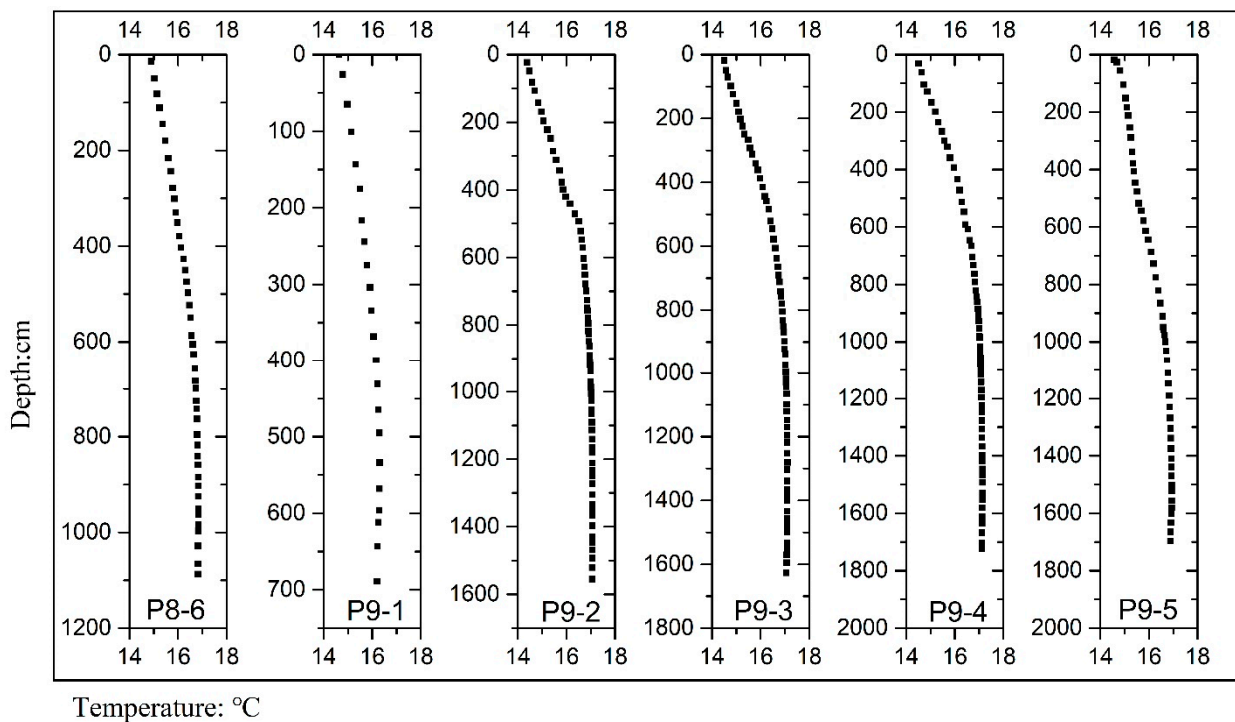

(c)

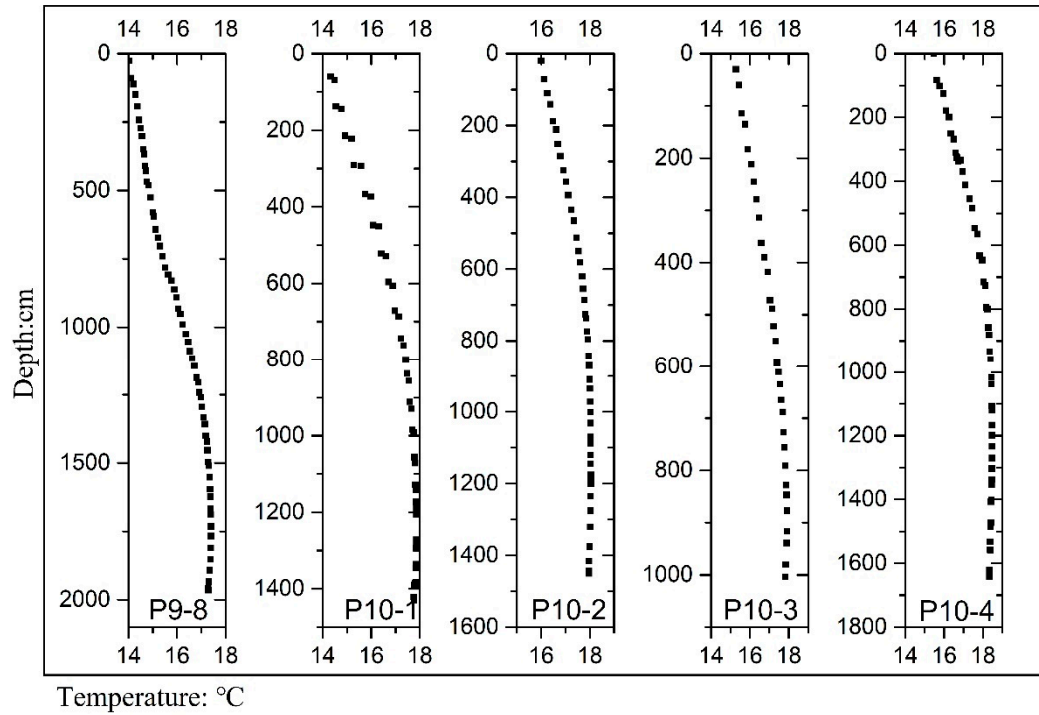

(d)

Figure S10 temperature profiles of Class 4

Table S1 Location of leakage zones by temperature profiles.

| Borehole | depth of leakage zone:<br>cm |
|----------|------------------------------|
| P3-8     | 250                          |
| P3-12    | 700                          |
| P3-13    | 900                          |
| P4-1     | 900                          |
| P4-2     | 1100                         |
| P9-6     | 600                          |
| P9-9     | 800                          |
| P9-10    | 500                          |
| P9-11    | 500                          |
| P9-12    | 600                          |
| P9-13    | 500                          |

Table S2 Time interval of SBDT.

| Boreholes | Time interval: s |           |           |           |
|-----------|------------------|-----------|-----------|-----------|
|           | $t_1-t_2$        | $t_2-t_3$ | $t_3-t_4$ | $t_4-t_5$ |
| P3-5      | 1034             | 1650      | 1998      | 3414      |
| P3-8      | 940              | 1741      | 2004      | 3429      |
| P9-7      | 1006             | 1214      | 692       | 665       |



|       |      |     |     |     |
|-------|------|-----|-----|-----|
| P9-9  | 592  | 542 | 473 | 591 |
| P9-12 | 1377 | 556 | 530 | 570 |

Table S3 time period and distance on P9-9 and P9-12

| Boreholes | Test: | Time period: s | Lower limit of distance: cm | Upper limit of distance: cm |
|-----------|-------|----------------|-----------------------------|-----------------------------|
| P9-9      | 1     | 592            | 152                         | 195                         |
|           | 2     | 542            | 171                         | 182                         |
|           | 3     | 473            | 130                         | 133                         |
|           | 4     | 591            | 191                         | 221                         |
| P9-12     | 1     | 1377           | 228                         | 976                         |
|           | 2     | 556            | 153                         | 458                         |
|           | 3     | 530            | 199                         | 530                         |
|           | 4     | 570            | 209                         | 349                         |
